# Supplementary material for: Body Composition in Young Adults Living With a Fontan Circulation: The Myopenic Profile
Source: PubMed Central journal article supplement (PMC7428525; doi:10.1161/jaha.119.015639), 2020-04-15
Supplement: JAH3-9-e015639-s001.pdf [file JAH3-9-e015639-s001.pdf]

# **SUPPLEMENTAL MATERIAL**

**Table S1. Biochemistry results.**

| Biochemical Result                     | n  | Mean ± SD or Median [IQR] | Lab Reference Range | Above range/below range |
|----------------------------------------|----|---------------------------|---------------------|-------------------------|
| <b>Hb (g/L)</b>                        |    |                           |                     |                         |
| Male                                   | 13 | 162.4 ± 9.7               | 130 - 170           | 2 (15)/0 (0)            |
| Female                                 | 15 | 147.5 ± 13                | 120 - 150           | 5 (33)/1 (7)            |
| <b>WCC (×10<sup>9</sup>/L)</b>         | 28 | 6.6 ± 2.3                 | 4 - 10              | 2 (7)/2 (7)             |
| <b>Plt (×10<sup>9</sup>/L)</b>         | 28 | 160 [128.3 – 217.3]       | 150 - 400           | 0 (0)/12 (43)           |
| <b>eGFR (ml/min/1.73m<sup>2</sup>)</b> | 24 | 115.5 [92.5 – 124]        | > 60                | -/0 (0)                 |
| <b>Albumin (g/L)</b>                   | 28 | 48 ± 3.2                  | 38 - 48             | 12 (43)/0 (0)           |
| <b>NT-proBNP (pmol/L)</b>              | 25 | 14.1 [7.2 – 29.6]         | < 13                | 13 (52)/-               |
| <b>INR</b>                             | 26 | 1.2 [1.1 – 1.8]           | 0.9 - 1.2           | 9 (35)/0 (0)            |
| <b>25(OH)-D (nmol/L)</b>               | 26 | 66 ± 26.2                 | > 50                | -/7 (27)                |
| <b>PTH (pmol/L)</b>                    | 25 | 5 [3.9 – 8.4]             | 2 - 6               | 10 (40)/0               |
| <b>hsCRP (mg/L)</b>                    | 27 | 1.5 [0.6 – 3.1]           | < 5.0               | 2 (7)/-                 |
| <b>TSH (mIU/L)</b>                     | 26 | 3 [2 – 5.2]               | 0.27 - 4.2          | 8 (31)/0                |
| <b>IGF-1 (nmol/L)</b>                  |    |                           |                     |                         |
| Male                                   | 13 | 26.9 ± 11.9               | 14.3 - 39.2         | 2 (15)/2 (15)           |
| Female                                 | 14 | 27.1 [22.4 – 38.7]        | 11.8 - 38.6         | 3 (21)/0 (0)            |
| <b>Insulin (pmol/L)</b>                | 27 | 47 [34 – 72]              | 10 - 96             | 4 (15)/0 (0)            |
| <b>C peptide (pmol/L)</b>              | 27 | 854 [682 – 1092]          | 200 - 1200          | 4 (15)/0 (0)            |
| <b>Leptin (ng/mL)</b>                  |    |                           |                     |                         |
| Male                                   | 13 | 11 ± 8.1                  | 2 - 5.6             | 9 (69)/1 (8)            |
| Female                                 | 14 | 21.7 [10.3 – 34]          | 3.7 - 11.1          | 10 (71)/0 (0)           |
| <b>Adiponectin (ug/mL)</b>             | 27 | 18.7 ± 6.8                | 3 - 30              | 3 (11)/0 (0)            |
| <b>SHBG (nmol/L)</b>                   |    |                           |                     |                         |
| Male                                   | 13 | 41.9 [29.7 – 49.2]        | 14 - 75             | 1 (8)/0 (0)             |
| Female                                 | 12 | 92 ± 39.1                 | 19 - 120            | 2 (17)/0                |
| <b>Testosterone (nmol/L)</b>           |    |                           |                     |                         |
| Male                                   | 13 | 16.2 ± 4.2                | 10 - 30             | 0 (0)/1 (8)             |
| Female                                 | 12 | 0.4 [0.3 – 0.8]           | 0 - 1.8             | 0 (0)/0 (0)             |
| <b>Oestradiol (pmol/L)</b>             |    |                           |                     |                         |
| Male                                   | 13 | 102.6 ± 36                | < 220               | 0 (0)/-                 |
| Female                                 | 12 | 224.5 [164 – 401.5]       | < 700               | 1 (8)/-                 |
| <b>FSH (IU/L)</b>                      |    |                           |                     |                         |
| Male                                   | 13 | 4.4 ± 2.1                 | 1.5 - 12.4          | 0 (0)/0 (0)             |
| Female                                 | 12 | 6.6 [4.1 – 12.2]          | 3.5 - 12.5          | 3 (25)/1 (8)            |
| <b>LH (IU/L)</b>                       |    |                           |                     |                         |
| Male                                   | 13 | 5.8 ± 2.1                 | 1.7 - 8.6           | 2 (15)/0 (0)            |
| Female                                 | 12 | 7.4 [4.6 – 11.9]          | 2.4 - 12.6          | 2 (17)/1 (8)            |
| <b>Prolactin (ng/mL)</b>               |    |                           |                     |                         |
| Male                                   | 13 | 9 ± 4.2                   | 2 - 16              | 0 (0)/0 (0)             |

|                                    |    |                 |            |              |
|------------------------------------|----|-----------------|------------|--------------|
| <b>Female</b>                      | 12 | 9 ± 4.5         | 2 - 20     | 0 (0)/0 (0)  |
| <b>Renin activity (fmol/L/sec)</b> | 19 | 270 [90 – 709]  | 130 - 2350 | 0 (0)/5 (26) |
| <b>Aldosterone (pmol/L)</b>        | 19 | 453 [212 – 919] | 60 - 980   | 3 (16)/0 (0) |
| <b>DHEAS (µmol/L)</b>              |    |                 |            |              |
| <b>Male</b>                        | 13 | 3.9 ± 1.5       | 3 - 18     | 0 (0)/3 (23) |
| <b>Female</b>                      | 12 | 2.8 ± 1.6       | 2 - 14     | 0 (0)/3 (25) |

Data shown are mean ± standard deviation, median [interquartile range (IQR)] or n (%). 25(OH)-D; 25-hydroxy-vitamin D, DHEAS; dehydroepiandrosterone sulphate, eGFR; estimated glomerular filtration rate, FSH; follicle-stimulating hormone, Hb; haemoglobin, hsCRP; high sensitive C-reactive protein, IGF-1; insulin-like growth factor 1, INR; international normalised ratio, LH; luteinizing hormone, NT-proBNP; N-terminal pro-brain natriuretic peptide, Plt; platelets, PTH; parathyroid hormone, SHBG; sex hormone binding globulin, TSH; thyroid-stimulating hormone, WCC; white cell count.

**Figure S1. Intrasubject comparison of percent body fat (%BF) in the setting of actual lean mass and ideal lean mass based on dual energy X-ray absorptiometry.**

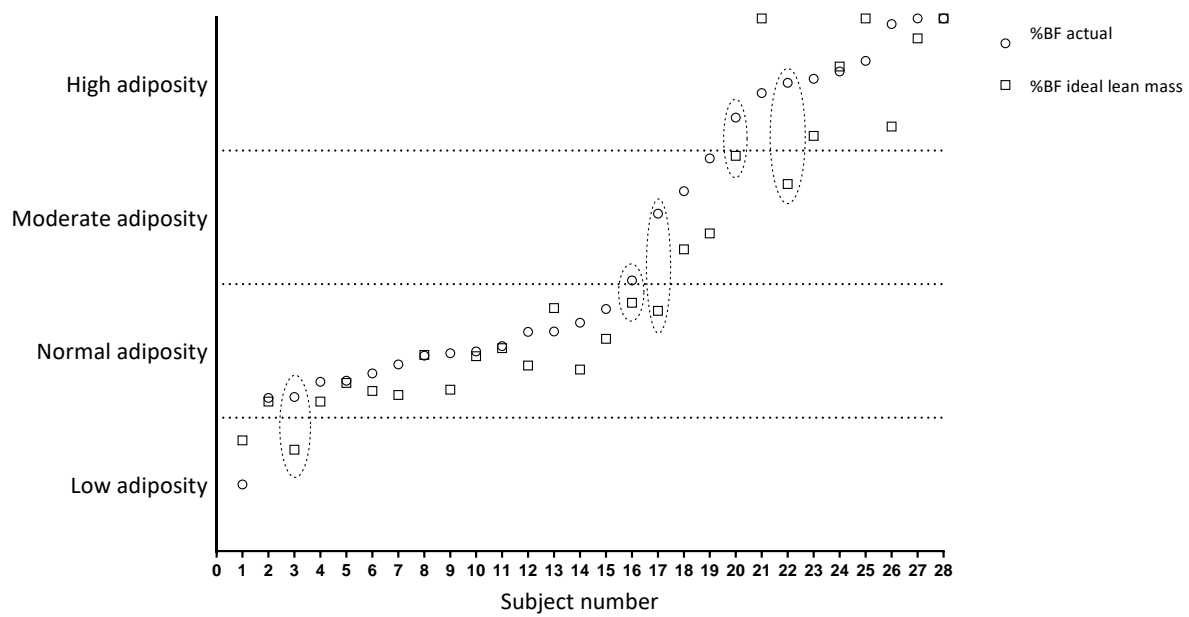

Values are presented as a percentage of each subject's categorical range based on reference cut points. There was 82% agreement despite the potential confounding effect of reduced lean mass in determining adiposity levels.
